# Supplementary material for: Adverse pregnancy and neonatal outcomes associated with Neisseria gonorrhoeae: systematic review and meta-analysis
Source: PubMed Central journal article supplement — Sex Transm Infect. 2021 Jan 12;97(2):104–11. doi: 10.1136/sextrans-2020-054653 (PMC7892372; doi:10.1136/sextrans-2020-054653), 2021-01-12
Supplement: sextrans-2020-054653supp001.pdf [file sextrans-2020-054653supp001.pdf]

**Adverse pregnancy and neonatal outcomes associated with *Neisseria gonorrhoeae*:  
systematic review and meta-analysis**

Lisa M Vallely,<sup>1</sup> Dianne Egli-Gany,<sup>2</sup> Handan Wand,<sup>3</sup> Caroline SE Homer,<sup>4,5</sup> William Pomat,<sup>6</sup>  
Rebecca Guy,<sup>7</sup> Bronwyn Silver,<sup>8</sup> Alice R Rumbold,<sup>9</sup> John M Kaldor,<sup>1</sup> Andrew J Vallely,<sup>1,6</sup> Nicola  
Low<sup>2</sup>

1. Public Health Interventions Research Group, Kirby Institute, Level 6, Wallace Wurth Building, UNSW Sydney, Sydney NSW 2052. [lvallely@kirby.unsw.edu.au](mailto:lvallely@kirby.unsw.edu.au)
2. Institute of Social and Preventive Medicine, University of Bern, Switzerland
3. Biostatistics and Databases program, Kirby Institute, UNSW Sydney, Australia
4. Centre for Midwifery, Child and Family Health, Faculty of Health, University of Technology Sydney, New South Wales
5. Maternal and Child Health, Burnet Institute, Melbourne, Victoria, Australia
6. Papua New Guinea Institute of Medical Research, Goroka, Papua New Guinea
7. Surveillance and Evaluation Research, Kirby Institute, UNSW Sydney, Australia
8. Public Health Division, Central Australian Aboriginal Congress, Alice Springs, Australia
9. Robinson Research Institute, University of Adelaide, Australia

## Table of Contents

|                                                                                                                                                                                 |    |
|---------------------------------------------------------------------------------------------------------------------------------------------------------------------------------|----|
| Figure S1: Flow chart of identified and included studies .....                                                                                                                  | 3  |
| Figure S2: Funnel plot for studies reporting on the outcome preterm birth .....                                                                                                 | 4  |
| Figure S3: Unadjusted effect sizes for association between <i>Neisseria gonorrhoeae</i> during pregnancy and preterm birth by country income group (random effects model) ..... | 5  |
| Figure S4: Adjusted effect sizes for association between <i>Neisseria gonorrhoeae</i> during pregnancy and preterm birth by country income group (random effects model) .....   | 6  |
| Figure S5: Unadjusted effect sizes for association between <i>Neisseria gonorrhoeae</i> during pregnancy and spontaneous abortion (random effects model) .....                  | 7  |
| Figure S6: Unadjusted effect sizes for association between <i>Neisseria gonorrhoeae</i> during pregnancy and premature rupture of membranes (random effects model) .....        | 8  |
| Figure S7: Unadjusted effect sizes for association between <i>Neisseria gonorrhoeae</i> during pregnancy and perinatal mortality (random effects model) .....                   | 9  |
| Figure S8: Unadjusted effect sizes for association between <i>Neisseria gonorrhoeae</i> during pregnancy and low birth weight (random effects model) .....                      | 10 |
| Figure S9: Adjusted effect sizes for association between <i>Neisseria gonorrhoeae</i> during pregnancy and low birth weight (random effects model) .....                        | 11 |
| Figure S10: Unadjusted effect sizes for association between <i>Neisseria gonorrhoeae</i> during pregnancy and ophthalmia neonatorum (random effects model) .....                | 12 |
| Text File S1: Search strategy .....                                                                                                                                             | 13 |
| Text File S2: Exclusion criteria at first stage .....                                                                                                                           | 14 |
| Table S1: Preferred reporting items for systematic review and meta-analysis (PRISMA) .....                                                                                      | 15 |
| Table S2: Descriptive tables: Study design, cohort studies (n=14) .....                                                                                                         | 17 |
| Table S3: Descriptive tables: Study design, case control studies (n=11) .....                                                                                                   | 19 |
| Table S4: Descriptive tables: Study design, cross sectional studies (n=8) .....                                                                                                 | 21 |
| Table S5: Studies or data not included in meta-analysis .....                                                                                                                   | 22 |
| Table S6: Study setting and socio-demographics, cohort studies (n=14) .....                                                                                                     | 23 |
| Table S7: Study setting and socio-demographics, case control studies (n=11) .....                                                                                               | 24 |
| Table S8: Study setting and socio-demographics, cross-sectional studies (n=8) .....                                                                                             | 25 |
| Table S9: Treatment provided for <i>Neisseria gonorrhoeae</i> and other STIs included in study, cohort studies (n=14) .....                                                     | 26 |
| Table S10: Treatment provided for <i>Neisseria gonorrhoeae</i> and other STIs included in study, case control studies (n=11) .....                                              | 27 |
| Table S11: Treatment provided for <i>Neisseria gonorrhoeae</i> and other STIs included in study, cross-sectional studies (n=8) .....                                            | 28 |
| Table S12: Risk of bias assessment, cohort studies (n=14) .....                                                                                                                 | 29 |
| Table S12: Risk of bias assessment, cohort studies (n=14), continued .....                                                                                                      | 31 |
| Table S13: Risk of bias assessment, case control studies (n=11) .....                                                                                                           | 33 |
| Table S14: Risk of bias assessment, cross-sectional studies (n=8) .....                                                                                                         | 34 |
| Table S15: Variables adjusted for in multivariable analysis .....                                                                                                               | 35 |
| Table S16: Summary estimates from fixed effects analysis .....                                                                                                                  | 36 |

Figure S1: Flow chart of identified and included studies

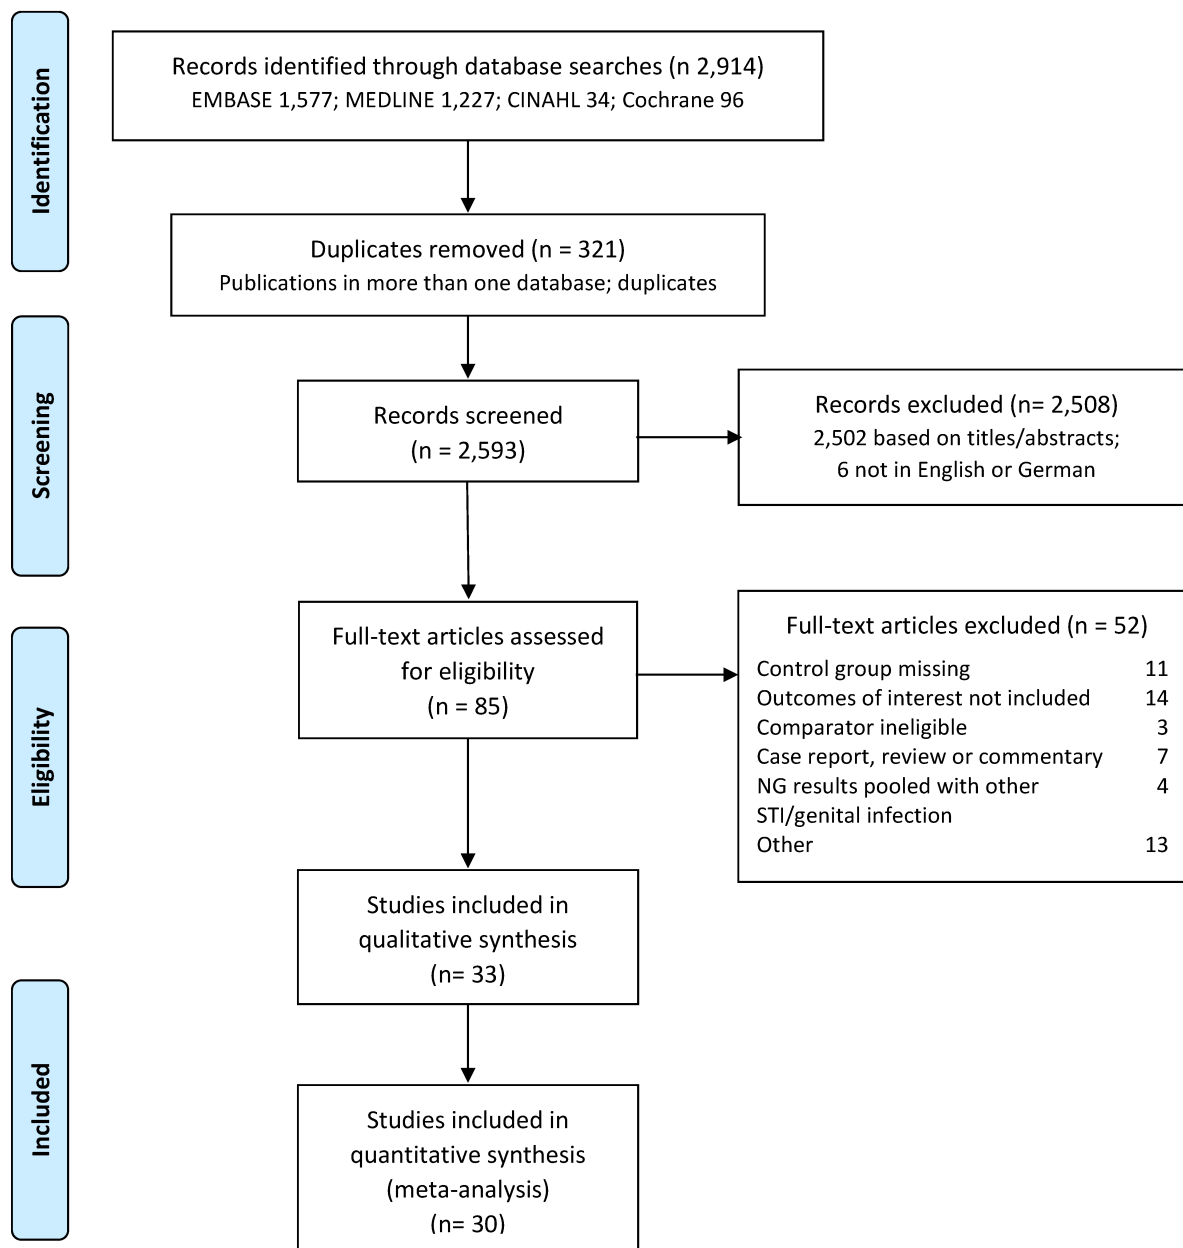

NG and preg and birth outcomes\_Sys review and meta analysis

**Figure S2: Funnel plot for studies reporting on the outcome preterm birth**

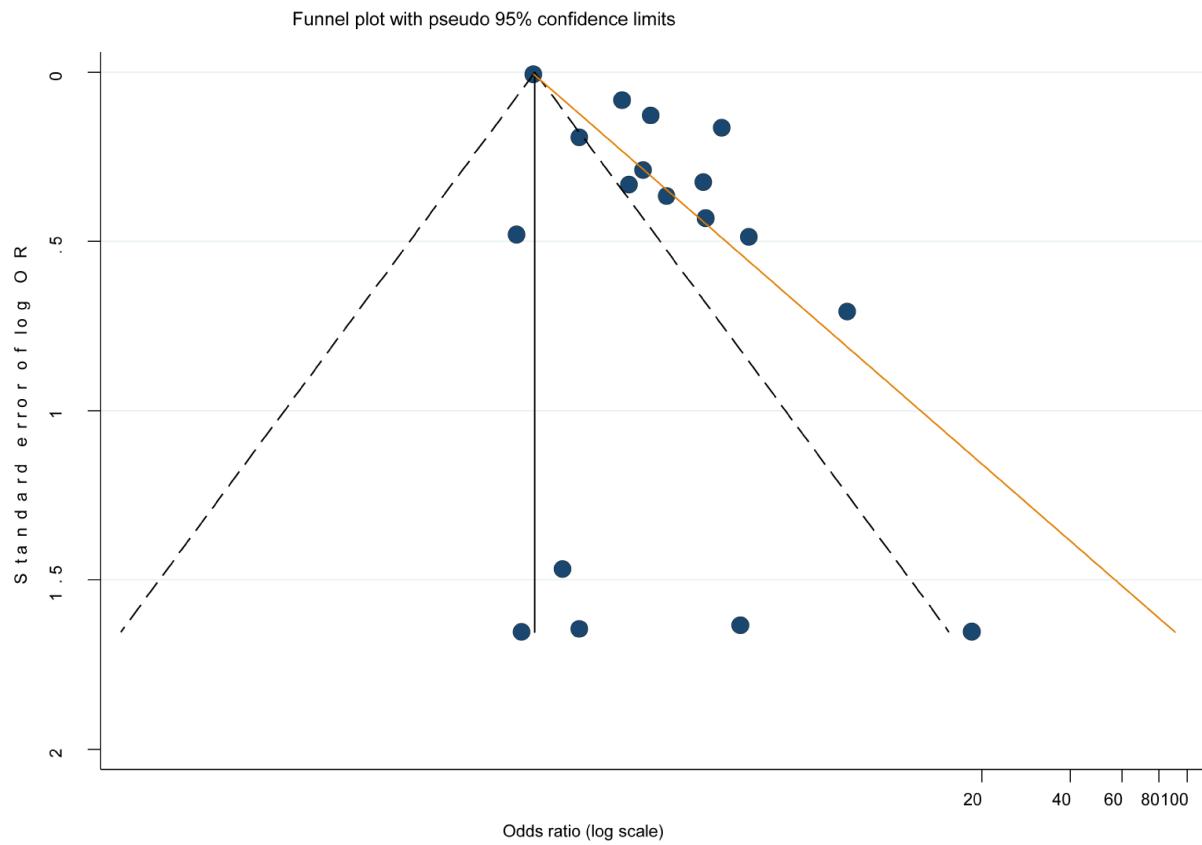

NG and preg and birth outcomes\_Sys review and meta analysis

**Figure S3: Unadjusted effect sizes for association between *Neisseria gonorrhoeae* during pregnancy and preterm birth by country income group (random effects model)**

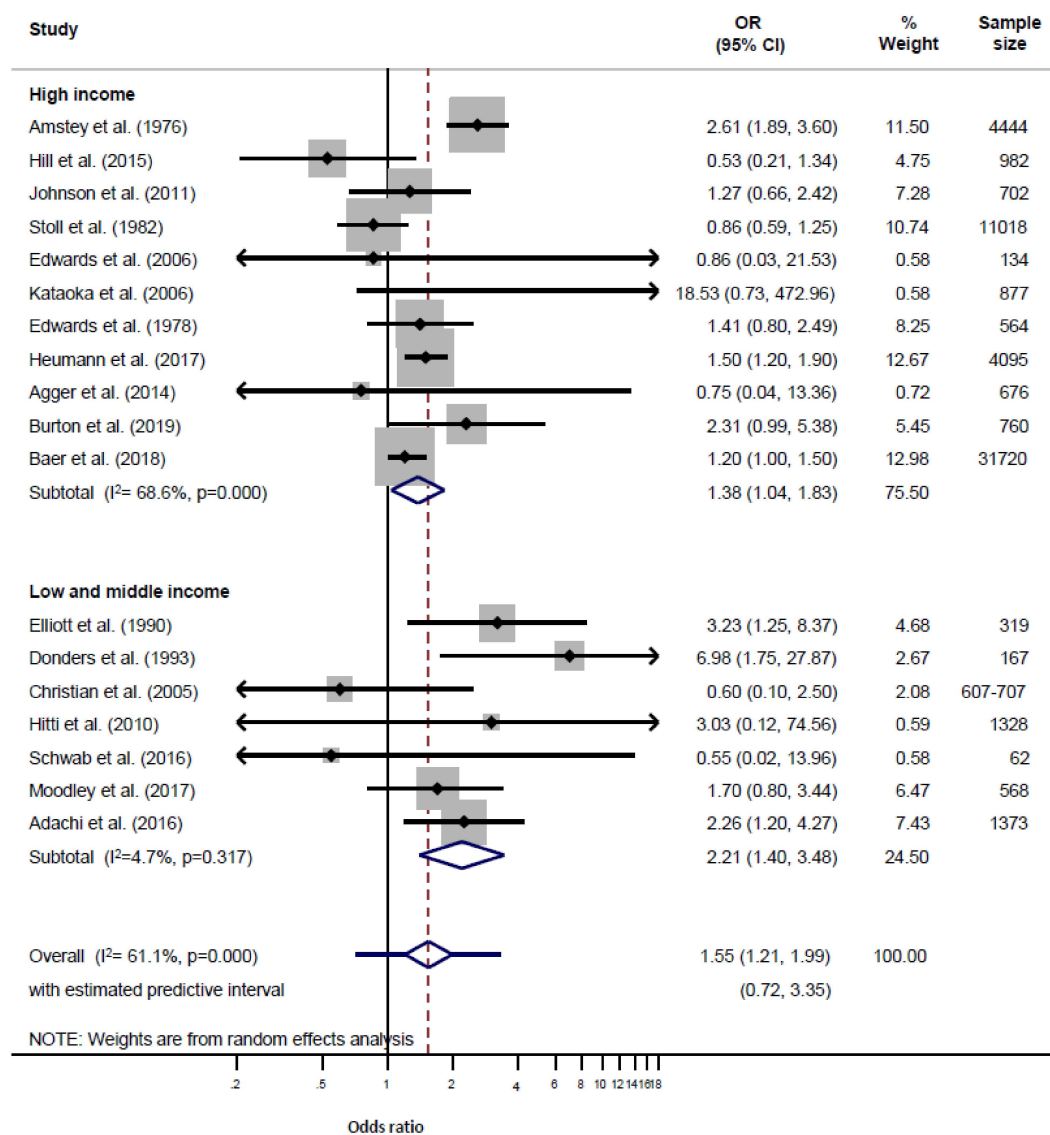

NG and preg and birth outcomes\_Sys review and meta analysis

**Figure S4: Adjusted effect sizes for association between *Neisseria gonorrhoeae* during pregnancy and preterm birth by country income group (random effects model)**

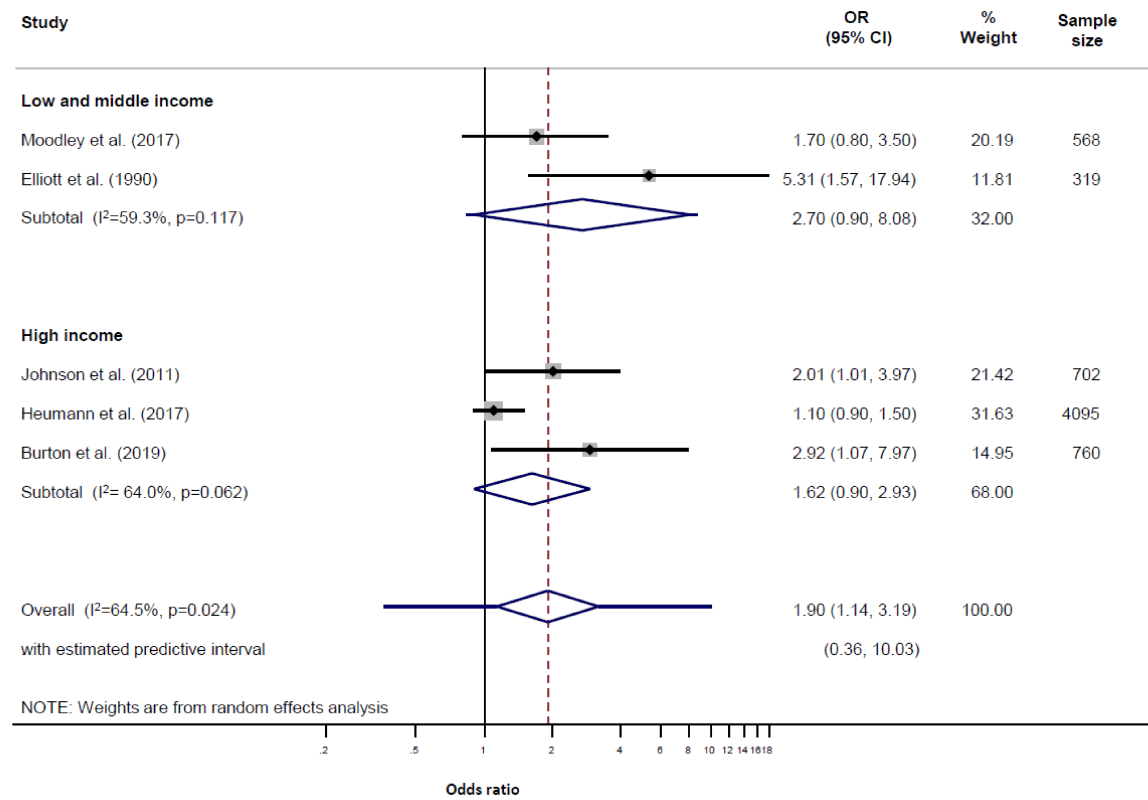

NG and preg and birth outcomes\_Sys review and meta analysis

**Figure S5: Unadjusted effect sizes for association between *Neisseria gonorrhoeae* during pregnancy and spontaneous abortion (random effects model)**

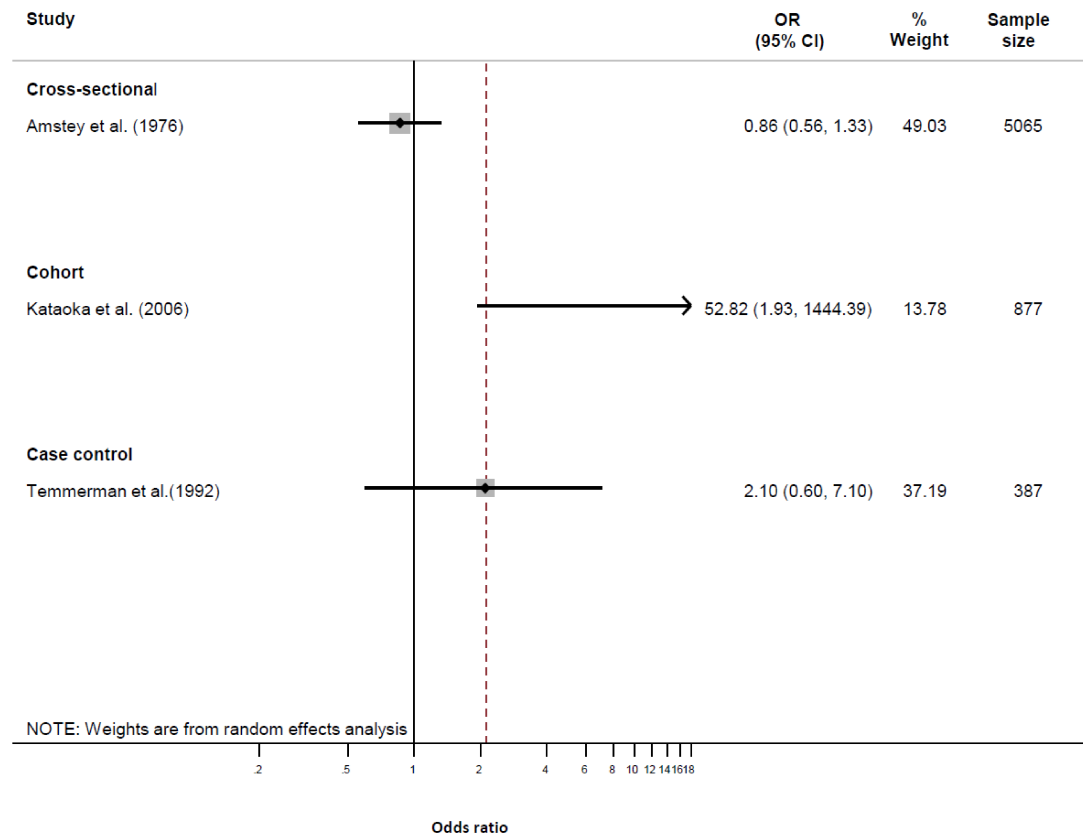

NG and preg and birth outcomes\_Sys review and meta analysis

**Figure S6: Unadjusted effect sizes for association between *Neisseria gonorrhoeae* during pregnancy and premature rupture of membranes (random effects model)**

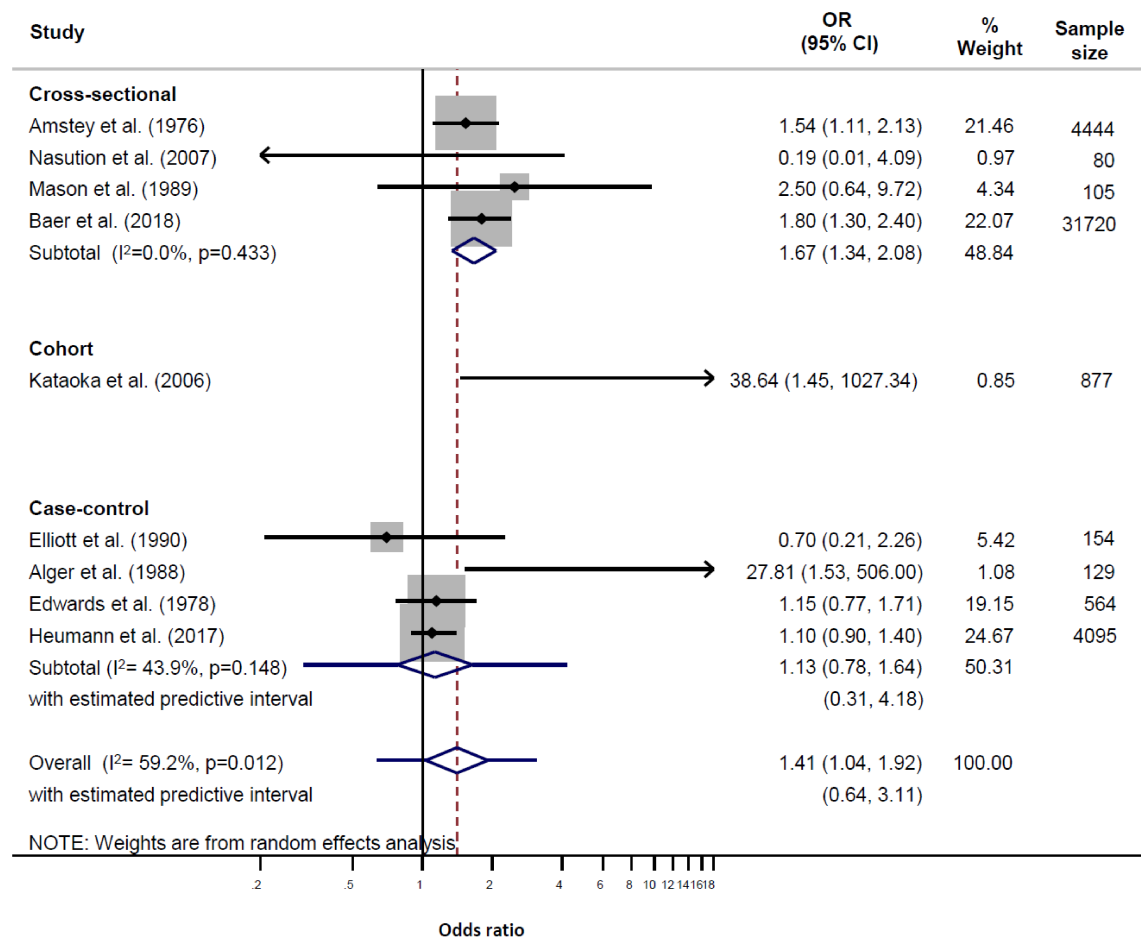



NG and preg and birth outcomes\_Sys review and meta analysis

**Figure S7: Unadjusted effect sizes for association between *Neisseria gonorrhoeae* during pregnancy and perinatal mortality (random effects model)**

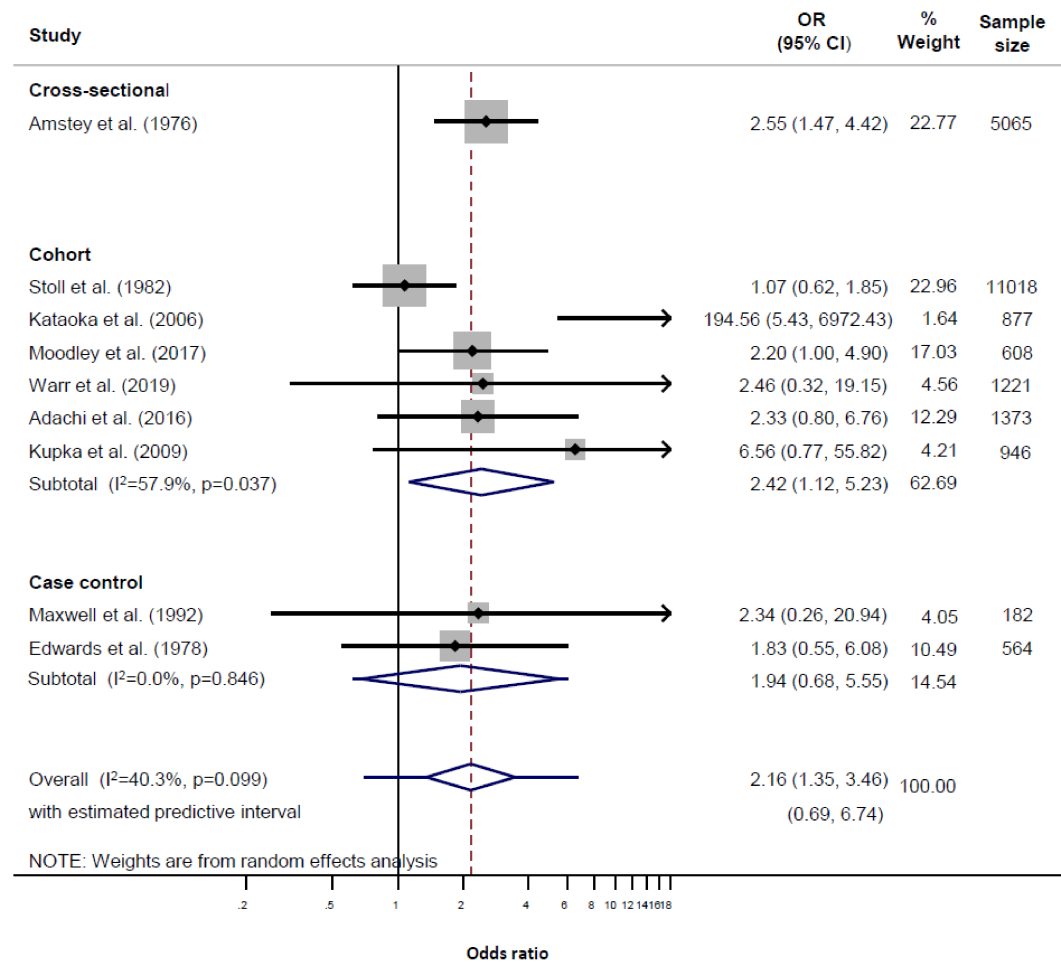

NG and preg and birth outcomes\_Sys review and meta analysis

**Figure S8: Unadjusted effect sizes for association between *Neisseria gonorrhoeae* during pregnancy and low birth weight (random effects model)**

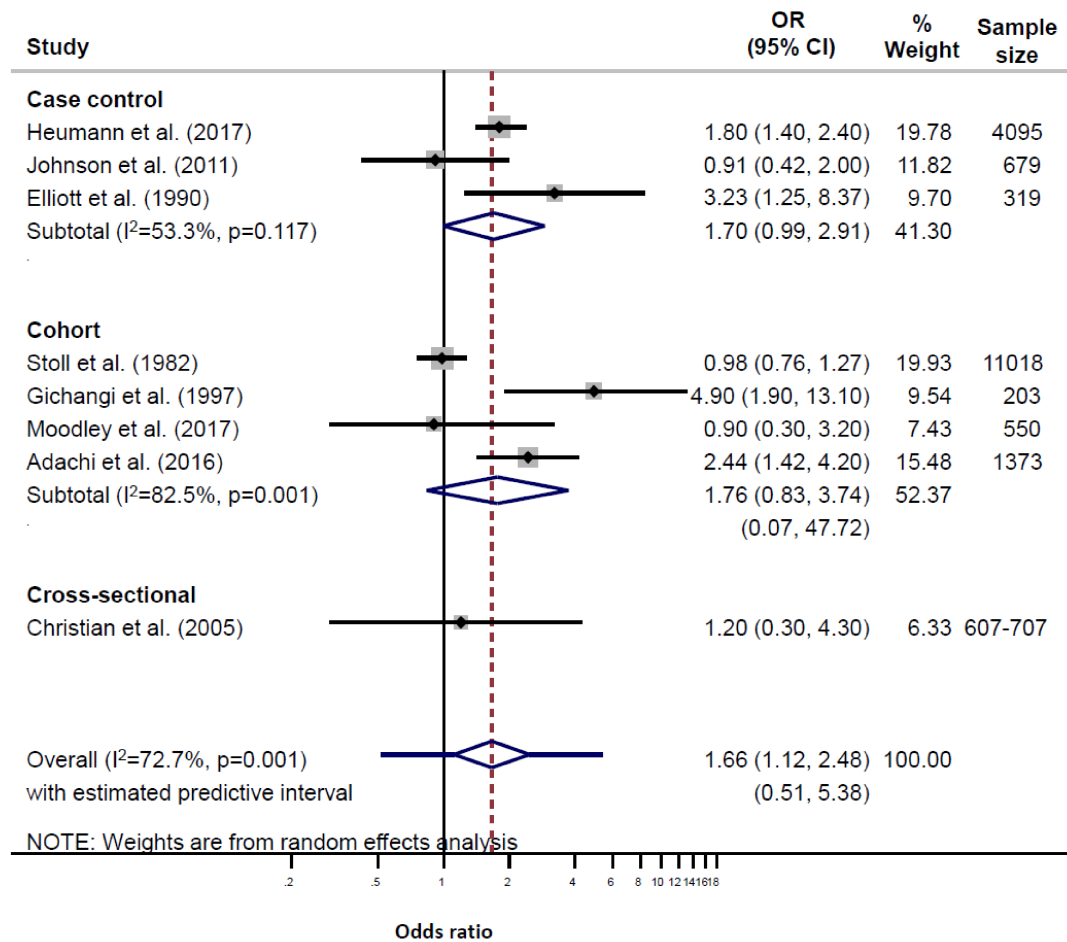

NG and preg and birth outcomes\_Sys review and meta analysis

**Figure S9: Adjusted effect sizes for association between *Neisseria gonorrhoeae* during pregnancy and low birth weight (random effects model)**

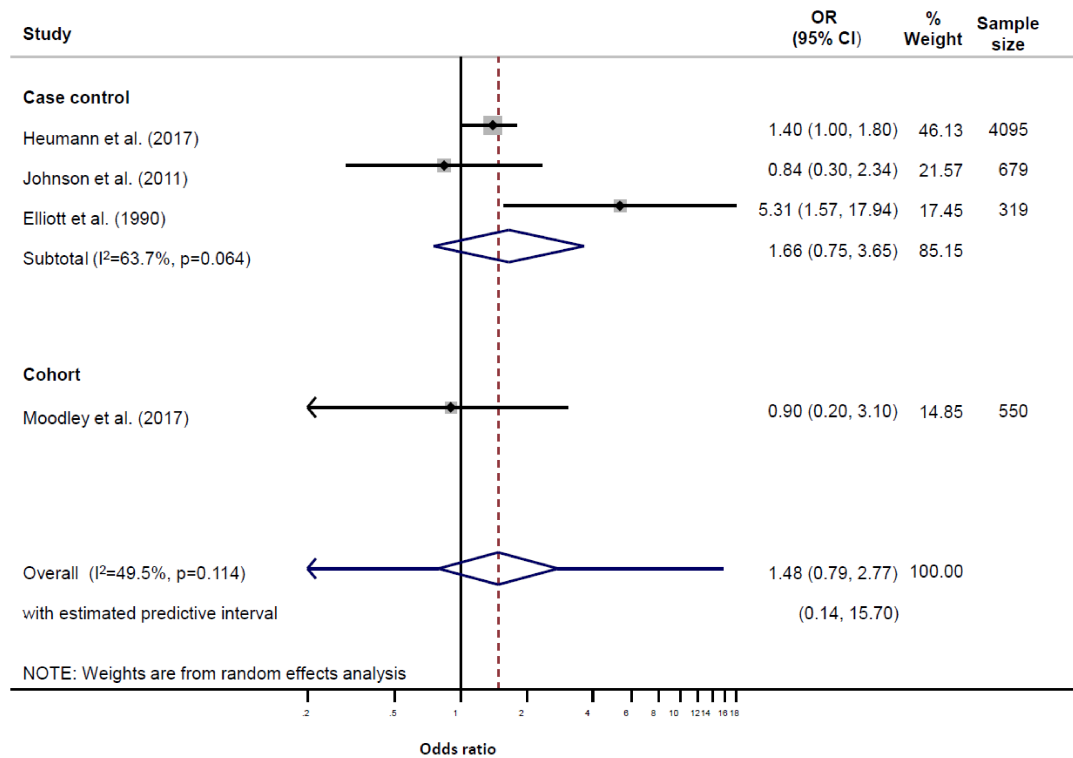

NG and preg and birth outcomes\_Sys review and meta analysis

**Figure S10: Unadjusted effect sizes for association between *Neisseria gonorrhoeae* during pregnancy and ophthalmia neonatorum (random effects model)**

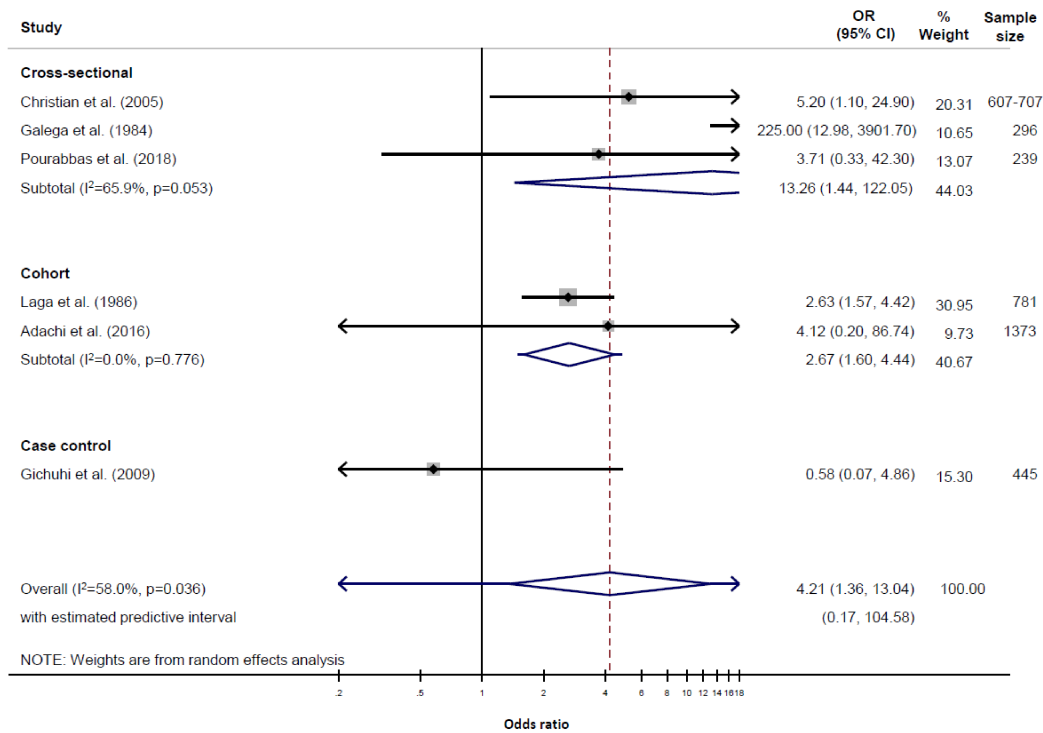

NG and preg and birth outcomes\_Sys review and meta analysis

### Text File S1: Search strategy

|                            |                                                                                                                                                                                                                                                                                                                                                                                                                                                                                                                                                                                                                                                                                                                                                                                                                                                |
|----------------------------|------------------------------------------------------------------------------------------------------------------------------------------------------------------------------------------------------------------------------------------------------------------------------------------------------------------------------------------------------------------------------------------------------------------------------------------------------------------------------------------------------------------------------------------------------------------------------------------------------------------------------------------------------------------------------------------------------------------------------------------------------------------------------------------------------------------------------------------------|
| 1. Terms for population    | "pregnancy" or "prenatal" or "antenatal"                                                                                                                                                                                                                                                                                                                                                                                                                                                                                                                                                                                                                                                                                                                                                                                                       |
| 2. Terms for exposure      | " <i>Neisseria gonorrhoeae</i> " or "gonorrhoeae" or "gonorrhoea"                                                                                                                                                                                                                                                                                                                                                                                                                                                                                                                                                                                                                                                                                                                                                                              |
| 3. Terms for outcomes      | "birth outcome" or "adverse birth outcome" or "adverse pregnancy outcome" or "perinatal morbidity" or "perinatal mortality" or "perinatal outcome" or "premature birth" or "premature delivery" or "very preterm birth" or "preterm birth" or "preterm delivery" or "premature labour" or "preterm labour" or "premature labor" or "preterm labor" or "premature rupture of membranes" or "preterm rupture of membranes" or "preterm premature rupture of membranes" or "low birth weight" or "intrauterine growth retardation" or "intrauterine growth restriction" or "small for gestational age" or "gestational age" or "stillbirth" or "perinatal death" or "neonatal mortality" or "neonatal morbidity" or "neonatal death" or "fetal death" or "miscarriage" or "spontaneous abortion" or "ophthalmia neonatorum" or "chorioamnionitis" |
| 4. Search = #1 + # 2 + # 3 |                                                                                                                                                                                                                                                                                                                                                                                                                                                                                                                                                                                                                                                                                                                                                                                                                                                |

*Free text terms in the search strategy will use truncated and wildcard forms e.g. pregn\*, gono\**

The "explode" function was applied to each MeSH heading.

NG and preg and birth outcomes\_Sys review and meta analysis

### **Text File S2: Exclusion criteria at first stage**

1. Any article in which the title mentions the following without reference to pregnancy, sexually transmitted infections or *N. gonorrhoeae* was excluded in the first stage of the screening process:

#### **Title contains**

- Sexual assault
- Algorithm
- Infertility
- Contraception/ Family planning
- Ectopic/tubal
- UTI in women
- Gonococcal arthritis
- Gynecology/gynaecology
- Induced abortion
- Pelvic inflammatory disease
- Syphilis (only)
- Trachomatis (only)
- Chlamydia (only)
- Treatment guidelines/ treatment schedules
- Anti-retroviral therapy
- Tetanus
- Sexual health
- Child sex abuse
- Polio

2. Any article that is found to be a case report, review article or letter was excluded at any stage of the review process.

**Table S1: Preferred reporting items for systematic review and meta-analysis (PRISMA)**

| Section/topic                      | #  | Checklist item                                                                                                                                                                                                                                                                                              | Page # |
|------------------------------------|----|-------------------------------------------------------------------------------------------------------------------------------------------------------------------------------------------------------------------------------------------------------------------------------------------------------------|--------|
| <b>TITLE</b>                       |    |                                                                                                                                                                                                                                                                                                             |        |
| Title                              | 1  | Identify the report as a systematic review, meta-analysis, or both.                                                                                                                                                                                                                                         | 1      |
| <b>ABSTRACT</b>                    |    |                                                                                                                                                                                                                                                                                                             |        |
| Structured summary                 | 2  | Provide a structured summary including, as applicable: background; objectives; data sources; study eligibility criteria, participants, and interventions; study appraisal and synthesis methods; results; limitations; conclusions and implications of key findings; systematic review registration number. | 2      |
| <b>INTRODUCTION</b>                |    |                                                                                                                                                                                                                                                                                                             |        |
| Rationale                          | 3  | Describe the rationale for the review in the context of what is already known.                                                                                                                                                                                                                              | 3      |
| Objectives                         | 4  | Provide an explicit statement of questions being addressed with reference to participants, interventions, comparisons, outcomes, and study design (PICOS).                                                                                                                                                  | 3      |
| <b>METHODS</b>                     |    |                                                                                                                                                                                                                                                                                                             |        |
| Protocol and registration          | 5  | Indicate if a review protocol exists, if and where it can be accessed (e.g., Web address), and, if available, provide registration information including registration number.                                                                                                                               | 2,3    |
| Eligibility criteria               | 6  | Specify study characteristics (e.g., PICOS, length of follow-up) and report characteristics (e.g., years considered, language, publication status) used as criteria for eligibility, giving rationale.                                                                                                      | 3      |
| Information sources                | 7  | Describe all information sources (e.g., databases with dates of coverage, contact with study authors to identify additional studies) in the search and date last searched.                                                                                                                                  | 3      |
| Search                             | 8  | Present full electronic search strategy for at least one database, including any limits used, such that it could be repeated.                                                                                                                                                                               | 3      |
| Study selection                    | 9  | State the process for selecting studies (i.e., screening, eligibility, included in systematic review, and, if applicable, included in the meta-analysis).                                                                                                                                                   | 4      |
| Data collection process            | 10 | Describe method of data extraction from reports (e.g., piloted forms, independently, in duplicate) and any processes for obtaining and confirming data from investigators.                                                                                                                                  | 4,5    |
| Data items                         | 11 | List and define all variables for which data were sought (e.g., PICOS, funding sources) and any assumptions and simplifications made.                                                                                                                                                                       | 4      |
| Risk of bias in individual studies | 12 | Describe methods used for assessing risk of bias of individual studies (including specification of whether this was done at the study or outcome level), and how this information is to be used in any data synthesis.                                                                                      | 5      |

|                               |    |                                                                                                                                                                                                          |      |
|-------------------------------|----|----------------------------------------------------------------------------------------------------------------------------------------------------------------------------------------------------------|------|
| Summary measures              | 13 | State the principal summary measures (e.g., risk ratio, difference in means).                                                                                                                            | 4    |
| Synthesis of results          | 14 | Describe the methods of handling data and combining results of studies, if done, including measures of consistency (e.g., $I^2$ ) for each meta-analysis.                                                | 4    |
| Risk of bias across studies   | 15 | Specify any assessment of risk of bias that may affect the cumulative evidence (e.g., publication bias, selective reporting within studies).                                                             | 4    |
| Additional analyses           | 16 | Describe methods of additional analyses (e.g., sensitivity or subgroup analyses, meta-regression), if done, indicating which were pre-specified.                                                         | 4    |
| <b>RESULTS</b>                |    |                                                                                                                                                                                                          |      |
| Study selection               | 17 | Give numbers of studies screened, assessed for eligibility, and included in the review, with reasons for exclusions at each stage, ideally with a flow diagram.                                          | 5    |
| Study characteristics         | 18 | For each study, present characteristics for which data were extracted (e.g., study size, PICOS, follow-up period) and provide the citations.                                                             | 5,6  |
| Risk of bias within studies   | 19 | Present data on risk of bias of each study and, if available, any outcome level assessment (see item 12).                                                                                                | 6    |
| Results of individual studies | 20 | For all outcomes considered (benefits or harms), present, for each study: (a) simple summary data for each intervention group (b) effect estimates and confidence intervals, ideally with a forest plot. | 6,7  |
| Synthesis of results          | 21 | Present results of each meta-analysis done, including confidence intervals and measures of consistency.                                                                                                  | 6,7  |
| Risk of bias across studies   | 22 | Present results of any assessment of risk of bias across studies (see Item 15).                                                                                                                          | 5    |
| Additional analysis           | 23 | Give results of additional analyses, if done (e.g., sensitivity or subgroup analyses, meta-regression [see Item 16]).                                                                                    | 7,8  |
| <b>DISCUSSION</b>             |    |                                                                                                                                                                                                          |      |
| Summary of evidence           | 24 | Summarize the main findings including the strength of evidence for each main outcome; consider their relevance to key groups (e.g., healthcare providers, users, and policy makers).                     | 8    |
| Limitations                   | 25 | Discuss limitations at study and outcome level (e.g., risk of bias), and at review-level (e.g., incomplete retrieval of identified research, reporting bias).                                            | 9,10 |
| Conclusions                   | 26 | Provide a general interpretation of the results in the context of other evidence, and implications for future research.                                                                                  | 9,10 |
| <b>FUNDING</b>                |    |                                                                                                                                                                                                          |      |
| Funding                       | 27 | Describe sources of funding for the systematic review and other support (e.g., supply of data); role of funders for the systematic review.                                                               | 10   |



**Table S2: Descriptive tables: Study design, cohort studies (n=14)**

| First author, publication year, location of study    | Assessment of Gestational age | Timing of specimen collection                                  | Specimen type; collection method       | Laboratory test | Total number enrolled | Outcomes                | Definition Provided                                    |
|------------------------------------------------------|-------------------------------|----------------------------------------------------------------|----------------------------------------|-----------------|-----------------------|-------------------------|--------------------------------------------------------|
| Adachi, 2016<br>Brazil, South Africa, Argentina, USA | NR/unclear                    | Intrapartum or postpartum                                      | Urine                                  | NAAT            | 1373                  | PTB<br>LBW<br>PM<br>ON  | 32-36 weeks<br><2500g<br>Not defined <sup>a</sup>      |
| Agger, 2014<br>USA                                   | NR/unclear                    | 1 <sup>st</sup> or 2 <sup>nd</sup> trimester                   | Endocervical swab; clinician collected | NAAT            | 676                   | PTB                     | <37 weeks                                              |
| Charles, 1970<br>USA                                 | NR/unclear                    | NR/unclear                                                     | Endocervical swab; clinician collected | Culture         | 2160                  | PROM<br>ON              | Not defined <sup>a</sup>                               |
| Donders, 1993<br>South Africa                        | NR/unclear                    | NR/unclear                                                     | Endocervical swab; clinician collected | Culture         | 167                   | PTB                     | <37 weeks                                              |
| Edwards, 2006<br>USA                                 | NR/unclear                    | NR/unclear                                                     | Endocervical swab; clinician collected | NAAT            | 134                   | PTB                     | <37 weeks                                              |
| Gichangi, 1997<br>Kenya                              | LMP                           | Postpartum                                                     | Endocervical swab; clinician collected | Culture         | 203                   | LBW                     | <2500g                                                 |
| Hill, 2015<br>USA                                    | NR/unclear                    | 1 <sup>st</sup> , 2 <sup>nd</sup> or 3 <sup>rd</sup> trimester | NR/unclear                             | NAAT            | 1120                  | PTB<br>PROM             | Not defined<br>Not defined                             |
| Kataoka, 2006<br>Japan                               | US/LMP                        | 1st trimester                                                  | Vaginal swab; clinician collected      | NAAT            | 877                   | PTB<br>SA<br>PROM<br>PM | <34 weeks<br>Not defined<br>Not defined<br>Not defined |

| First author, publication year, location of study | Assessment of Gestational age | Timing of specimen collection                                                               | Specimen type; collection method                    | Laboratory test | Total number enrolled | Outcomes         | Definition Provided                 |
|---------------------------------------------------|-------------------------------|---------------------------------------------------------------------------------------------|-----------------------------------------------------|-----------------|-----------------------|------------------|-------------------------------------|
| Kupka, 2009<br>Tanzania                           | LMP                           | 1 <sup>st</sup> , 2 <sup>nd</sup> and 3 <sup>rd</sup> trimester                             | Endocervical swab; vaginal swab/clinician collected | NR              | 1017                  | PM               | ≥28 weeks <sup>a</sup>              |
| Laga, 1986<br>Kenya                               | Newborn assessment            | Postpartum                                                                                  | Endocervical swab; clinician collected              | Culture         | 781                   | ON               | <sup>b</sup>                        |
| Moodley, 2017<br>South Africa                     | US/FH/LMP                     | 1 <sup>st</sup> , 2 <sup>nd</sup> and 3 <sup>rd</sup> trimester and postpartum <sup>c</sup> | NR/unclear                                          | NAAT            | 615                   | PTB<br>LBW<br>PM | <37 weeks<br><2500 g<br>≥21 weeks   |
| Schwab, 2015<br>Indonesia                         | LMP                           | 2nd trimester                                                                               | Vaginal swab; NR/unclear                            | NAAT            | 62                    | PTB              | <37 weeks                           |
| Stoll, 1982<br>USA                                | NR/Unclear                    | 1 <sup>st</sup> , 2 <sup>nd</sup> or 3 <sup>rd</sup> trimester                              | Endocervical swab; clinician collected              | Culture         | 11018                 | PTB<br>LBW<br>PM | <35 weeks<br>≤2500 g<br>Not defined |
| Warr, 2019<br>Kenya                               | US/FH/LMP                     | 2 <sup>nd</sup> and 3 <sup>rd</sup> trimester and postpartum                                | Vaginal swab, self-collected                        | NAAT            | 1221                  | PM <sup>^</sup>  | ≥20 weeks<br><28 days               |

**Abbreviations:** FH, fundal height; LMP, last menstrual period; LBW, low birth weight; NAAT, nucleic acid amplification tests; NN, neonatal; NR, not reported; ON, ophthalmia neonatorum; PROM, premature rupture of membranes; PTB, preterm birth; SA, spontaneous abortion; US, ultrasound; <sup>a</sup> Data for fresh stillbirths (without signs or symptoms of skin disintegration or maceration) included in meta-analysis; <sup>b</sup> assumes standard definition of acute, mucopurulent infection occurring in the first 4 weeks of life; <sup>c</sup> the trimester of swab collection is not clear from the study; postpartum swabs were taken at 14 weeks postpartum. <sup>^</sup> Includes infants who died between 1-27 days of age.

**Table S3: Descriptive tables: Study design, case control studies (n=11)**

| First author, publication year, study location | Assessment of Gestational age | Timing of specimen collection                                                | Specimen type; collection method           | Laboratory test | Total number enrolled | Outcomes           | Definition provided                             |
|------------------------------------------------|-------------------------------|------------------------------------------------------------------------------|--------------------------------------------|-----------------|-----------------------|--------------------|-------------------------------------------------|
| Alger, 1988<br>USA                             | US/FH/LMP                     | 2 <sup>nd</sup> or 3 <sup>rd</sup> trimester                                 | Endocervical swab; clinician collected     | Culture         | 136                   | PROM               | >20 up to 37 weeks                              |
| Burton, 2019<br>Australia                      | NR/unclear                    | 1 <sup>st</sup> , 2 <sup>nd</sup> & 3 <sup>rd</sup> trimester and postpartum | Urine collection, vaginal swab; NR/unclear | NAAT & culture  | 760                   | PTB                | <37 weeks                                       |
| Choi, 2012<br>South Korea                      | NR/unclear                    | NR /unclear                                                                  | Vaginal swab; clinician collected          | NAAT            | 217                   | PTB                | Not defined                                     |
| Edwards, 1978<br>USA                           | NR/unclear                    | NR/unclear                                                                   | NR/unclear; NR/unclear                     | Culture         | 564                   | PTB<br>PROM<br>PM  | Not defined<br>Not defined<br>Not defined       |
| Elliott, 1990<br>Kenya                         | Newborn assessment            | Postpartum                                                                   | Endocervical swab; clinician collected     | Culture         | 341                   | PTB<br>PROM<br>LBW | <37 weeks<br>RoM before onset labour<br>≤2500 g |
| Gichuhi, 2009<br>Kenya                         | NR/unclear                    | 3 <sup>rd</sup> trimester                                                    | Endocervical swab; clinician collected     | NAAT            | 510                   | ON                 | <sup>a</sup>                                    |
| Heumann, 2017<br>USA                           | US                            | NR/unclear                                                                   | NR/unclear; NR/unclear                     | NR/unclear      | 4095                  | PTB<br>PROM<br>LBW | <37 weeks<br>≥12 hours before labour<br><2500 g |
| Hitti, 2010<br>Peru                            | US/LMP/<br>newborn assessment | Postpartum                                                                   | Endocervical swab; clinician collected     | NAAT            | 1328                  | PTB                | 20-36 weeks                                     |
| Johnson, 2011<br>USA                           | Newborn assessment            | NR/unclear                                                                   | NR/unclear; clinician collected            | Culture         | 730                   | PTB<br>LBW         | <37 weeks<br><2500 g                            |

| First author, publication year, study location | Assessment of Gestational age | Timing of specimen collection                                     | Specimen type; collection method                           | Laboratory test | Total number enrolled | Outcomes   | Definition provided                |
|------------------------------------------------|-------------------------------|-------------------------------------------------------------------|------------------------------------------------------------|-----------------|-----------------------|------------|------------------------------------|
| Maxwell, 1992<br>USA                           | US/LMP                        | 2 <sup>nd</sup> or 3 <sup>rd</sup> trimester                      | Endocervical swab;<br>clinician collected                  | Culture         | 182                   | PROM<br>PM | PROM 26-33<br>weeks<br>Not defined |
| Temmerman, 1992<br>Kenya                       | NR/unclear                    | 1 <sup>st</sup> , 2 <sup>nd</sup> or 3 <sup>rd</sup><br>trimester | Endocervical swab,<br>vaginal swab;<br>clinician collected | Culture         | 390                   | SA         | <20 weeks                          |

**Abbreviations:** FH, fundal height; LMP, last menstrual period; LBW, Low Birth Weight; NAAT, nucleic acid amplification test; NN, neonatal; NR, not reported; ON, ophthalmia neonatorum; PROM, premature rupture of membranes; PTB, Preterm birth; SA, spontaneous abortion; US, ultrasound; <sup>a</sup> assumes standard definition of acute, mucopurulent infection occurring in the first 4 weeks of life.

**Table S4: Descriptive tables: Study design, cross sectional studies (n=8)**

| First author, publication year, location of study | Assessment of Gestational age | Timing of specimen collection                               | Specimen type; collection method                          | Laboratory test  | Total number enrolled | Outcomes                | Definition provided                                                  |
|---------------------------------------------------|-------------------------------|-------------------------------------------------------------|-----------------------------------------------------------|------------------|-----------------------|-------------------------|----------------------------------------------------------------------|
| Amstey, 1976<br>USA                               | NR/unclear                    | 1 <sup>st</sup> or 3 <sup>rd</sup> trimester or intrapartum | Endocervical swab; clinician collected                    | Culture          | 5065                  | PTB<br>PROM<br>SA<br>PM | Not defined<br>RoM before onset labour<br>Not defined<br>Not defined |
| Baer, 2019<br>USA                                 | NR/unclear                    | 2 <sup>nd</sup> or 3 <sup>rd</sup> trimester                | NR/unclear; NR/unclear                                    | NR/Unclear       | 31,720                | PTB<br>PROM             | <37 weeks<br><37 weeks                                               |
| Christian, 2005<br>Nepal                          | LMP                           | Postpartum                                                  | Urine; self-collected                                     | NAAT             | 709                   | PTB<br>LBW<br>ON        | <37 weeks<br><2500g <sup>a</sup>                                     |
| Galega, 1984<br>Cameroon                          | NR/unclear                    | Intrapartum                                                 | Vaginal swab; NR/unclear                                  | Culture          | 296                   | ON                      | <sup>a</sup>                                                         |
| Mann, 2010<br>USA                                 | NR/unclear                    | NR/unclear                                                  | NR/unclear; NR/unclear                                    | NR/unclear       | 86654                 | PTB                     | <37 weeks                                                            |
| Mason, 1989<br>Zimbabwe                           | NR/unclear                    | Intrapartum                                                 | Endocervical swab; clinician collected                    | Culture          | 214                   | PROM                    | RoM 12 hours before onset labour                                     |
| Nasution, 2007<br>Malaysia                        | NR/unclear                    | Intrapartum and postpartum                                  | Vaginal swab, placental swab & blood; clinician collected | NAAT and culture | 180                   | PTB<br>PROM             | <37 weeks<br><37 weeks                                               |
| Pourabbas, 2018<br>Iran                           | NR/unclear                    | 3 <sup>rd</sup> trimester                                   | Endocervical swab; clinician collected                    | NAAT             | 239                   | ON                      | <sup>a</sup>                                                         |

**Abbreviations:** LBW, low birth weight; NAAT, nucleic acid amplification tests; NN, neonatal; NR, not reported; ON, ophthalmia neonatorum; PM, perinatal mortality (neonatal death and/or stillbirth); PROM, premature rupture of membranes; PTB, preterm birth; RoM, rupture of membranes; SA, spontaneous abortion; <sup>a</sup> assumes standard definition of acute, mucopurulent infection occurring in the first 4 weeks of life.

**Table S5. Studies or data not included in meta-analysis**

| First author, publication year | Outcomes not included | Reason not included in meta-analysis | NG+/outcome+ | NG-/outcome+ | NG+/outcome- | NG-/outcome- |
|--------------------------------|-----------------------|--------------------------------------|--------------|--------------|--------------|--------------|
| Charles, 1970                  | PROM                  | NG+/PROM-=m; NG-/PROM-=m             | 1            | m            | 148          | m            |
|                                | ON                    | NG+/ON+=0; NG-/ON+=0                 | 0            | 0            | 158          | 2002         |
| Choi, 2012                     | PTB                   | NG+/PTB+=0; NG+/PTB-=0               | 0            | 100          | 0            | 117          |
| Hill, 2015 <sup>a</sup>        | PROM                  | NG+/PROM+=0; NG+/PROM-=0             | 0            | 37           | 0            | 896          |
| Mann, 2010                     | PTB                   | NG+/PTB-=m; NG-/PTB-=m               | 749          | 7182         | m            | m            |
| Maxwell, 1992 <sup>b</sup>     | PROM                  | NG+/PROM-=m; NG-/PROM-=m             | 11           | 171          | m            | m            |
| Nasution, 2007 <sup>c</sup>    | PTB                   | NG+/PTB+=0; NG+/PTB-=0               | 0            | 30           | 0            | 30           |

<sup>a</sup> Data for PTB included in meta-analysis; <sup>b</sup> data for NN death included in meta-analysis; <sup>c</sup> data for PROM included in meta-analysis.

**Abbreviations:** m, missing; ON, ophthalmia neonatorum; PROM, premature rupture of membranes; PTB, preterm birth; +, positive; -, negative

**Table S6: Study setting and socio-demographics, cohort studies (n=14)**

| First author, year of publication | Study setting   | Urban /rural location | Age in years (range/mean/median) | Ethnicity      | Smokers included (%) | Multiple pregnancies |
|-----------------------------------|-----------------|-----------------------|----------------------------------|----------------|----------------------|----------------------|
| Adachi, 2016                      | NR/<br>Unclear  | NR/<br>Unclear        | NR/26.9/26.0                     | Mixed          | Yes/<br>32.1%        | NR/<br>unclear       |
| Agger, 2014                       | Health Facility | Mixed                 | NR/NR/NR                         | Mixed          | NR/<br>unclear       | Yes                  |
| Charles, 1970                     | Health Facility | NR/<br>Unclear        | 14-39/22.3/NR                    | Black          | NR/<br>unclear       | NR/<br>unclear       |
| Donders, 1993                     | Health Facility | Urban                 | NR/26.8/NR                       | Black          | NR/<br>unclear       | No                   |
| Edwards, 2006                     | Health Facility | Urban                 | NR/NR/NR                         | Mixed          | Yes/<br>15.7%        | No                   |
| Gichangi, 1997                    | Health Facility | Urban                 | NR/NR/NR                         | Black          | NR/<br>unclear       | NR/<br>unclear       |
| Hill, 2015                        | Health Facility | Urban                 | NR/NR/NR                         | Mixed          | NR/<br>unclear       | NR/<br>unclear       |
| Kataoka, 2006                     | Health Facility | Urban                 | NR/NR/NR                         | Asian          | NR/<br>unclear       | No                   |
| Kupka, 2009                       | Health Facility | Urban                 | NR/24.7/NR                       | NR/<br>unclear | NR/<br>unclear       | No                   |
| Laga, 1986                        | Health Facility | Urban                 | NR/NR/NR                         | NR/<br>unclear | NR/<br>unclear       | Yes                  |
| Moodley, 2017                     | Health Facility | Mixed                 | NR/25.4/NR                       | NR/<br>unclear | NR/<br>unclear       | NR/<br>unclear       |
| Schwab, 2015                      | Health Facility | Rural                 | 17-42/26.6/NR                    | NR/<br>unclear | NR/<br>unclear       | NR/<br>unclear       |
| Stoll, 1982                       | Health Facility | Urban                 | NR/NR/NR                         | NR/<br>unclear | NR/<br>unclear       | NR/<br>unclear       |
| Warr, 2019                        | Health Facility | Rural                 | 19-27/22/NR                      | NR/<br>unclear | NR/<br>unclear       | No                   |

**Abbreviations:** NR, not reported

**Table S7: Study setting and socio-demographics, case control studies (n=11)**

| First author, year of publication | Study setting   | Urban /rural /location | Age in years (range/mean/median) | Ethnicity  | Smokers included/ (%) | Multiple pregnancies |
|-----------------------------------|-----------------|------------------------|----------------------------------|------------|-----------------------|----------------------|
| Alger, 1988                       | Health Facility | Urban                  | NR/NR/NR                         | Mixed      | NR/unclear            | NR/unclear           |
| Burton, 2019                      | Health Facility | Urban                  | NR/NR/NR                         | Mixed      | Yes/57.1%             | No                   |
| Choi, 2012                        | Health Facility | Urban                  | NR/NR/NR                         | Asian      | NR/unclear            | NR/unclear           |
| Edwards, 1978                     | Health Facility | NR/unclear             | 14-34/19.8/NR                    | Mixed      | NR/unclear            | NR/unclear           |
| Elliott, 1990                     | Health Facility | Urban                  | NR/NR/NR                         | Black      | NR/unclear            | No                   |
| Gichuhi, 2009                     | Health Facility | Urban                  | NR/NR/25                         | NR/unclear | NR/unclear            | NR/unclear           |
| Heumann, 2017                     | NR/unclear      | NR/unclear             | NR/NR/NR                         | Mixed      | Yes/14.3%             | No                   |
| Hitti, 2010                       | Health Facility | Urban                  | NR/NR/NR                         | NR/unclear | Yes/6.5%              | Yes                  |
| Johnson, 2011                     | Health Facility | Urban                  | 13-24/NR/NR                      | Mixed      | Yes/unclear           | No                   |
| Maxwell, 1992                     | Health Facility | Urban                  | NR/NR/NR                         | Mixed      | NR/unclear            | No                   |
| Temmerman, 1992                   | Health Facility | Urban                  | NR/NR/NR                         | Black      | NR/unclear            | NR/unclear           |

**Abbreviations:** NR, not reported



**Table S8: Study setting and socio-demographics, cross-sectional studies (n=8)**

| <b>First author, year of publication</b> | <b>Study setting</b> | <b>Urban /rural location</b> | <b>Age in years (range/mean/median)</b> | <b>Ethnicity</b> | <b>Smokers included/ (%)</b> | <b>Multiple pregnancies</b> |
|------------------------------------------|----------------------|------------------------------|-----------------------------------------|------------------|------------------------------|-----------------------------|
| Amstey, 1976                             | Health Facility      | NR/unclear                   | NR/NR/NR                                | NR/unclear       | NR/unclear                   | NR/unclear                  |
| Baer, 2019                               | NR/Unclear           | NR/unclear                   | NR/NR/NR                                | Mixed            | Yes/ 9.3%                    | No                          |
| Christian, 2005                          | Community            | Rural                        | NR/NR/NR                                | Asian            | Yes/unclear                  | NR/unclear                  |
| Galega, 1984                             | Health Facility      | Urban                        | 15-39/NR/NR                             | Black            | NR/unclear                   | Yes                         |
| Mann, 2010                               | NR/unclear           | NR/unclear                   | NR/NR/NR                                | Mixed            | Yes/ 19.9%                   | No                          |
| Mason, 1989                              | Health Facility      | Urban                        | NR/NR/NR                                | Black            | NR/unclear                   | NR/unclear                  |
| Nasution, 2007                           | Health Facility      | NR/unclear                   | 24-38/NR/NR                             | Asian            | NR/unclear                   | NR/unclear                  |
| Pourabbas, 2018                          | Health Facility      | NR/unclear                   | 18-45/27.7/NR                           | NR/unclear       | NR/unclear                   | NR/unclear                  |

**Abbreviations:** NR, Not reported

**Table S9: Treatment provided for *Neisseria gonorrhoeae* and other STIs included in study, cohort studies (n=14)**

| First author, year of publication | Treatment provided for NG infection | Time provided                                                              | Other STI in study population <sup>a</sup>                                                                   |
|-----------------------------------|-------------------------------------|----------------------------------------------------------------------------|--------------------------------------------------------------------------------------------------------------|
| Adachi, 2016                      | Unclear                             | NR/Unclear                                                                 | CT 249/1373 (18.1%)<br>HIV 1373/1373 (100.0%)<br>Syphilis 129/1373 (9.4%)                                    |
| Agger, 2014                       | Some positive women                 | NR/Unclear                                                                 | CT 33/676 (4.9%)<br>MG 9/676 (1.3%)                                                                          |
| Charles, 1970                     | Some positive women                 | NR/Unclear                                                                 | Syphilis 4/158 (2.5%)                                                                                        |
| Donders, 1993                     | Some positive women                 | NR/Unclear                                                                 | CT 22/167 (13.2%)<br>Syphilis 15/167(9.0%)                                                                   |
| Edwards, 2006                     | Unclear                             | NR/Unclear                                                                 | BV 18/134 (13.4%)<br>CT 10/134 (7.5%)<br>MG 27/134 (20.2%)<br>Syphilis 0/134 (0.0%)<br>TV 10/134 (7.5%)      |
| Gichangi, 1997                    | Some positive women                 | 2 <sup>nd</sup> , 3 <sup>rd</sup> trimester                                | HIV 17/209 (8.1%)<br>Syphilis 9/207 (4.3%)                                                                   |
| Hill, 2015                        | Unclear                             | NR/unclear                                                                 | CT 160/1120 (14.2%)                                                                                          |
| Kataoka, 2006                     | Some positive women                 | 1 <sup>st</sup> , 2 <sup>nd</sup> trimester                                | CT 28/877 (3.2%)<br>MG 7/877 (0.8%)                                                                          |
| Kupka, 2009                       | Unclear                             | NR/Unclear                                                                 | HIV 1017/1017 (100%)<br>Syphilis 155/947 (16.4%)                                                             |
| Laga, 1986                        | All positive women                  | Postpartum                                                                 | CT 201/938 (21%)                                                                                             |
| Moodley, 2017                     | All positive women                  | Timing unclear but symptomatic women, same day; asymptomatic at next visit | CT 115/615 (18.7%)<br>HIV 230/615 (37.4%)<br>TV 91/615 (14.8%)                                               |
| Schwab, 2015                      | Unclear                             | NR/unclear                                                                 | BV 10/62 (16.1%)<br>CT 1/62 (1.6%)                                                                           |
| Stoll, 1982                       | Some positive women                 | NR/unclear                                                                 | NR                                                                                                           |
| Warr, 2019                        | All positive women                  | 2 <sup>nd</sup> , 3 <sup>rd</sup> trimester or postpartum                  | BV 271/1221 (22.2%)<br>CT 65/1221 (5.3%)<br>HIV 0/1221 (0.0%)<br>Syphilis 10/1221(0.8%)<br>TV 79/1221 (6.5%) |

**Abbreviations:** BV, bacterial vaginosis; CT, *Chlamydia trachomatis*; HIV, human immunodeficiency virus; MG, *Mycoplasma genitalium*; NG, *Neisseria gonorrhoeae*; NR, not reported; TV, *Trichomonas vaginalis*.

<sup>a</sup> Data were extracted for BV, CT, HIV, MG, Syphilis and TV only

**Table S10: Treatment provided for *Neisseria gonorrhoeae* and other STIs included in study, case control studies (n=11)**

| First author, year of publication | Treatment provided for NG infection | Time provided                                                                | Other STI in study population <sup>a</sup>                                                                  |
|-----------------------------------|-------------------------------------|------------------------------------------------------------------------------|-------------------------------------------------------------------------------------------------------------|
| Alger, 1988                       | All positive women                  | 2 <sup>nd</sup> , 3 <sup>rd</sup> trimester                                  | CT 36/136 (26.5%)                                                                                           |
| Burton, 2019                      | Some positive women                 | 1 <sup>st</sup> , 2 <sup>nd</sup> , 3 <sup>rd</sup> trimester and postpartum | CT 40/760 (5.3%)<br>TV 93/760 (12.2%)<br>Syphilis 3/760 (0.4%)                                              |
| Choi, 2012 <sup>b</sup>           | Unclear                             | NR/Unclear                                                                   | CT 3/126 (2.4%)<br>MG 0/126 (0.0%)<br>TV 0/126 (0.0%)                                                       |
| Edwards, 1978                     | Some positive women                 | 1 <sup>st</sup> , 2 <sup>nd</sup> , 3 <sup>rd</sup> trimester                | NR                                                                                                          |
| Elliott, 1990                     | Unclear                             | NR/Unclear                                                                   | BV 46/276 (16.6%)<br>CT 42 /284 (14.8%)<br>HIV 9/194 (4.6%)<br>Syphilis 13/290 (4.5%)                       |
| Gichuhi, 2009                     | All positive women                  | 3 <sup>rd</sup> trimester                                                    | BV 164/427 (38.4%)<br>CT 20/472 (4.2%)<br>HIV 510/510 (100%)<br>Syphilis 3/173 (1.7%)<br>TV 77/479 (16.1%)  |
| Heumann, 2017                     | Unclear                             | NR/Unclear                                                                   | CT 434/4095 (10.6%)<br>Syphilis 12/4095 (0.3%)                                                              |
| Hitti, 2010                       | Some positive women                 | NR/Unclear                                                                   | CT 98/1328 (7.4%)<br>MG 41/1328 (3.1%)<br>TV 33/1328 (2.5%)                                                 |
| Johnson, 2011                     | All positive women                  | NR/Unclear                                                                   | BV 220/730 (30.1%)<br>CT 101/730 (13.8%)<br>HIV 1/730 (0.1%)<br>Syphilis 6/730 (0.8%)<br>TV 109/730 (14.9%) |
| Maxwell, 1992                     | All positive women                  | 2 <sup>nd</sup> , 3 <sup>rd</sup> trimester                                  | CT 0/182 (0.0%)                                                                                             |
| Temmerman, 1992                   | Some positive women                 | NR/Unclear                                                                   | HIV 40/390 (10.3%)<br>Syphilis 17/386 (4.4%)                                                                |

**Abbreviations:** BV, bacterial vaginosis; CT, *Chlamydia trachomatis*; HIV, human immunodeficiency virus; MG, *Mycoplasma genitalium*; NG, *Neisseria gonorrhoeae*; NR, not reported; TV, *Trichomonas vaginalis*

<sup>a</sup> Data were extracted for BV, CT, HIV, MG, Syphilis and TV only

<sup>b</sup> Control group was not tested for STI and not included

**Table S11: Treatment provided for *Neisseria gonorrhoeae* and other STIs included in study, cross-sectional studies (n=8)**

| First author, year of publication | Treatment provided for NG infection | Time provided | Other STI in study population <sup>a</sup>           |
|-----------------------------------|-------------------------------------|---------------|------------------------------------------------------|
| Amstey, 1976                      | Some positive women                 | NR/Unclear    | NR                                                   |
| Baer, 2019                        | Unclear                             | NR/Unclear    | CT 13633/15860 (86.0%)<br>Syphilis 1180/15860 (7.4%) |
| Christian, 2005                   | Some positive women                 | Postpartum    | CT 10/1014 (1.0%)                                    |
| Galega, 1984                      | All positive women                  | Postpartum    | NR                                                   |
| Mann, 2010                        | Unclear                             | NR/Unclear    | CT 650/108346 (0.6%)<br>TV 3034/108346 (2.8%)        |
| Mason, 1989                       | Unclear                             | NR/Unclear    | CT 17/188 (9.0%)<br>TV 39/214 (18.2%)                |
| Nasution, 2007                    | Unclear                             | NR/Unclear    | CT 13/180 (7.2%)                                     |
| Pourabbas, 2018                   | No treatment                        | NA            | CT 37/239 (15.5%)                                    |

**Abbreviations:** CT, *Chlamydia trachomatis*; HIV, human immunodeficiency virus; MG, *Mycoplasma genitalium*; NA, not applicable; NR, not reported; TV, *Trichomonas vaginalis*.

<sup>a</sup> Data were extracted for BV, CT, HIV, MG, Syphilis and TV only

**Table S12: Risk of bias assessment, cohort studies (n=14)**

|                                                                                               | Adachi<br>2016      | Agger<br>2014      | Charles<br>1970  | Donders<br>1993   | Edwards<br>2006 | Gichangi<br>1997   | Hill<br>2015        | Kataoka<br>2006     |
|-----------------------------------------------------------------------------------------------|---------------------|--------------------|------------------|-------------------|-----------------|--------------------|---------------------|---------------------|
| The method of allocation to intervention group was unrelated to potential confounding factors | NA                  | NA                 | NA               | NA                | NA              | NA                 | NA                  | NA                  |
| Attempts made within design or analysis to balance the both groups for potential confounders. | Yes                 | Yes                | No               | Yes               | Yes             | Yes                | No                  | Yes                 |
| The groups were comparable at baseline, including all major confounding factors.              | No                  | No                 | Unclear          | Unclear           | No              | Unclear            | No                  | No                  |
| Based on above answers, was selection bias present?                                           | High                | High               | Unclear          | High              | High            | Unclear            | High                | High                |
| If so, what is the likely direction of its effect?                                            | ↑ AO                | Unclear            | Unclear          | ↑ AO & STI        | Unclear         | Unclear            | ↑ AO & STI          | Unclear             |
| The comparison groups received the same care and support apart from the exposure(s) studied.  | Yes                 | Unclear            | No               | No                | Unclear         | Yes                | Unclear             | Unclear             |
| Participants receiving care and support were kept 'blind' to intervention allocation.         | NA                  | NA                 | NA               | NA                | NA              | NA                 | NA                  | NA                  |
| Individuals administering care and support were kept 'blind' to intervention allocation.      | NA                  | NA                 | NA               | NA                | NA              | NA                 | NA                  | NA                  |
| Based on above answers, was performance bias present?                                         | Low                 | Unclear            | High             | High              | Unclear         | Low                | Unclear             | Unclear             |
| If so, what is the likely direction of its effect?                                            | NA                  | Unclear            | Unclear          | Unclear           | Unclear         | NA                 | Unclear             | Unclear             |
| All groups followed up for an equal length of time?                                           | Yes                 | Yes                | No               | No                | Yes             | Yes                | Unclear             | Yes                 |
| Number of participants did not complete the intervention in each group?                       | NA                  | NA                 | NA               | NA                | NA              | NA                 | NA                  | NA                  |
| The groups were comparable for intervention completion.                                       | NA                  | NA                 | NA               | NA                | NA              | NA                 | NA                  | NA                  |
| For how many participants were no outcome data available?                                     | 311/1684<br>(18.5%) | 107/783<br>(13.7%) | 0/2160<br>(0.0%) | 75/256<br>(29.3%) | 3/137<br>(2.2%) | 117/320<br>(36.6%) | 602/1722<br>(35.0%) | 148/1040<br>(14.2%) |
| Were groups comparable for outcome data?                                                      | Yes                 | Unclear            | Unclear          | Unclear           | Unclear         | Unclear            | Unclear             | Unclear             |

|                                                                                | Adachi<br>2016 | Agger<br>2014 | Charles<br>1970 | Donders<br>1993 | Edwards<br>2006 | Gichangi<br>1997 | Hill<br>2015  | Kataoka<br>2006 |
|--------------------------------------------------------------------------------|----------------|---------------|-----------------|-----------------|-----------------|------------------|---------------|-----------------|
| Based on above answers, was attrition bias present?                            | Low            | Unclear       | Unclear         | High            | Low             | High             | High          | Unclear         |
| If so, what is the likely direction of its effect?                             | NA             | Unclear       | Unclear         | ↑ AO &<br>STI   | NA              | Unclear          | ↑ AO &<br>STI | Unclear         |
| The study had an appropriate length of follow-up.                              | Yes            | Yes           | Yes             | Yes             | Yes             | Yes              | Yes           | Yes             |
| The study used a precise definition of outcome.                                | Yes            | Yes           | No              | Yes             | Yes             | Yes              | No            | No              |
| A valid, reliable method used to determine the outcome?                        | Yes            | Unclear       | No              | Unclear         | Yes             | Yes              | Yes           | Yes             |
| Investigators were kept 'blind' to participants' exposure to the intervention. | NA             | NA            | NA              | NA              | NA              | NA               | NA            | NA              |
| Investigators were kept 'blind' to other important confounding factors.        | NA             | NA            | NA              | NA              | NA              | NA               | NA            | NA              |
| Based on above answers, was detection bias present?                            | Low            | Unclear       | High            | Low             | Unclear         | Low              | Unclear       | Low             |
| If so, what is the likely direction of its effect?                             | NA             | Unclear       | ↑ AO            | NA              | Unclear         | NA               | Unclear       | NA              |
| Overall assessment of internal validity                                        | ++             | +             | -               | -               | +               | +                | +             | +               |
| Overall assessment of external validity                                        | ++             | +             | -               | -               | +               | +                | ++            | -               |

**Abbreviations:** AO, adverse outcomes; High, high risk of bias; Low, low risk of bias; Unclear, unclear of risk of bias; NA, not applicable; ++, all or most of checklist criteria fulfilled; + some of checklist criteria fulfilled; - few or no checklist criteria fulfilled.

**Table S12: Risk of bias assessment, cohort studies (n=14), continued**

|                                                                                               | <b>Kupka<br/>2009</b> | <b>Laga<br/>1986</b> | <b>Moodley<br/>2017</b> | <b>Schwab<br/>2015</b> | <b>Stoll<br/>1982</b> | <b>Warr<br/>2019</b> |
|-----------------------------------------------------------------------------------------------|-----------------------|----------------------|-------------------------|------------------------|-----------------------|----------------------|
| The method of allocation to intervention group was unrelated to potential confounding factors | NA                    | NA                   | NA                      | NA                     | NA                    | NA                   |
| Attempts made within design or analysis to balance the both groups for potential confounders. | Yes                   | No                   | Yes                     | No                     | No                    | Yes                  |
| The groups were comparable at baseline, including all major confounding factors.              | Unclear               | Unclear              | Unclear                 | Unclear                | Unclear               | Yes                  |
| Based on above answers, was selection bias present?                                           | Low                   | High                 | Low                     | High                   | High                  | Low                  |
| If so, what is the likely direction of its effect?                                            | NA                    | Unclear              | NA                      | Unclear                | Unclear               | NA                   |
| The comparison groups received the same care and support apart from the exposure(s) studied.  | Yes                   | Unclear              | Yes                     | Unclear                | No                    | Yes                  |
| Participants receiving care and support were kept 'blind' to intervention allocation.         | NA                    | NA                   | NA                      | NA                     | NA                    | NA                   |
| Individuals administering care and support were kept 'blind' to intervention allocation.      | NA                    | NA                   | NA                      | NA                     | NA                    | NA                   |
| Based on above answers, was performance bias present                                          | Unclear               | Unclear              | Low                     | Unclear                | High                  | Low                  |
| If so, what is the likely direction of its effect?                                            | Unclear               | Unclear              | NA                      | Unclear                | ↑AO                   | NA                   |
| All groups followed up for an equal length of time?                                           | Yes                   | No                   | Yes                     | No                     | No                    | Yes                  |
| Number of participants who did not complete the intervention in each group?                   | NA                    | NA                   | NA                      | NA                     | NA                    | NA                   |
| The groups were comparable for intervention completion.                                       | NA                    | NA                   | NA                      | NA                     | NA                    | NA                   |
| For how many participants in were no outcome data available?                                  | 71/1017<br>(7.0%)     | 232/1013<br>(22.9%)  | 36/615<br>(5.9%)        | 97/159<br>(61.0%)      | 0/11081<br>(0.0%)     | 3/211<br>(0.2%)      |
| Were groups comparable for outcome data?                                                      | Unclear               | Unclear              | Unclear                 | Unclear                | Unclear               | Unclear              |
| Based on above answers, was attrition bias present?                                           | Low                   | High                 | Unclear                 | High                   | High                  | Low                  |
| If so, what is the likely direction of its effect?                                            | NA                    | Unclear              | Unclear                 | Unclear                | Unclear               | NA                   |

|                                                                                | <b>Kupka<br/>2009</b> | <b>Laga<br/>1986</b> | <b>Moodley<br/>2017</b> | <b>Schwab<br/>2015</b> | <b>Stoll<br/>1982</b> | <b>Warr<br/>2019</b> |
|--------------------------------------------------------------------------------|-----------------------|----------------------|-------------------------|------------------------|-----------------------|----------------------|
| The study had an appropriate length of follow-up.                              | Yes                   | Yes                  | Yes                     | Yes                    | Yes                   | Yes                  |
| The study used a precise definition of outcome.                                | Yes                   | No                   | Yes                     | Yes                    | Yes                   | Yes                  |
| A valid, reliable method used to determine the outcome?                        | Yes                   | Yes                  | Yes                     | No                     | Unclear               | Yes                  |
| Investigators were kept 'blind' to participants' exposure to the intervention. | NA                    | NA                   | NA                      | NA                     | NA                    | NA                   |
| Investigators were kept 'blind' to other important confounding factors.        | NA                    | NA                   | NA                      | NA                     | NA                    | NA                   |
| Based on above answers, was detection bias present?                            | No                    | Unclear              | Low                     | High                   | Unclear               | Low                  |
| If so, what is the likely direction of its effect?                             | NA                    | Unclear              | NA                      | Unclear                | Unclear               | NA                   |
| Overall assessment of internal validity                                        | +                     | +                    | ++                      | -                      | +                     | ++                   |
| Overall assessment of external validity                                        | +                     | -                    | +                       | -                      | -                     | +                    |

**Abbreviations:** AO, adverse outcomes; High, high risk of bias; Low, low risk of bias; Unclear, unclear of risk of bias; NA, not applicable; ++, all or most of checklist criteria fulfilled; + some of checklist criteria fulfilled; - few or no checklist criteria fulfilled.



**Table S13: Risk of bias assessment, case control studies (n=11)**

|                                                                                              | Alger<br>1988 | Burton<br>2019 | Choi<br>2012 | Edwards<br>1978 | Elliot<br>1990 | Gichuhi<br>2009 | Heumann<br>2017 | Hitti<br>2010 | Johnson<br>2011 | Maxwell<br>1992 | Temmer-<br>man 1992 |
|----------------------------------------------------------------------------------------------|---------------|----------------|--------------|-----------------|----------------|-----------------|-----------------|---------------|-----------------|-----------------|---------------------|
| Appropriate and clearly focused question.                                                    | WC            | WC             | WC           | PA              | AA             | WC              | AA              | WC            | AA              | AA              | WC                  |
| The cases and controls are taken from comparable populations.                                | AA            | PA             | NR           | AA              | PA             | AA              | PA              | AA            | AA              | AA              | PA                  |
| The same exclusion criteria are used for both cases and controls.                            | AA            | WC             | NAD          | NR              | WC             | NR              | AA              | AA            | PA              | NR              | PA                  |
| What was the participation rate for each group (cases)?                                      | NR            | NA             | NR           | NA              | NR             | NR              | NA              | 98.7%         | NA              | NA              | 96.4%               |
| What was the participation rate for each group (controls)?                                   | NR            | NA             | NR           | NA              | NR             | NR              | NA              | 99.9%         | NA              | NA              | 97.0%               |
| Both groups are compared to establish their similarities or differences.                     | NR            | WC             | PA           | NR              | WC             | NR              | NR              | WC            | WC              | NR              | NR                  |
| Cases are clearly defined and differentiated from controls.                                  | WC            | WC             | WC           | AA              | WC             | WC              | WC              | WC            | WC              | AA              | WC                  |
| It is clearly established that controls are not cases.                                       | WC            | WC             | WC           | AA              | WC             | WC              | WC              | WC            | WC              | WC              | WC                  |
| Measures taken to prevent knowledge of primary exposure from influencing case ascertainment. | NA            | NA             | NA           | NA              | NA             | NA              | NA              | NA            | NA              | NA              | NA                  |
| Exposure status is measured in a standard, valid and reliable way.                           | AA            | PA             | WC           | NR              | AA             | WC              | NR              | WC            | PA              | AA              | AA                  |
| Main potential confounders are accounted for in design/analysis                              | AA            | AA             | NAD          | AA              | AA             | AA              | AA              | AA            | WC              | NAD             | AA                  |
| Confidence intervals provided?                                                               | No            | Yes            | No           | No              | Yes            | Yes             | Yes             | Yes           | Yes             | No              | Yes                 |
| Study results internally valid?                                                              | +             | +              | +            | +               | ++             | +               | +               | ++            | ++              | -               | +                   |
| Study results externally valid?                                                              | +             | -              | +            | +               | +              | +               | ++              | +             | ++              | -               | +                   |

**Abbreviations:** WC, well covered; AA, adequately addressed; PA, poorly addressed; NAD, not addressed; NR, not reported; NA, not applicable; ++, all or most of checklist criteria fulfilled; + some of checklist criteria fulfilled; - few or no checklist criteria fulfilled.

**Table S14: Risk of bias assessment, cross-sectional studies (n=8)**

|                                                                                    | Amstey<br>1976 | Baer<br>2019 | Christian<br>2005 | Galega<br>1984 | Mann<br>2010 | Mason<br>1989 | Nasution<br>2007 | Pourabbas<br>2018 |
|------------------------------------------------------------------------------------|----------------|--------------|-------------------|----------------|--------------|---------------|------------------|-------------------|
| Source population, source area well described?                                     | NR             | ++           | +                 | -              | +            | +             | -                | +                 |
| Is the eligible population or area representative of the source population?        | +              | ++           | -                 | NR             | -            | +             | NR               | NR                |
| Do the selected participants or areas represent the eligible population or area?   | ++             | ++           | -                 | NR             | -            | +             | NR               | NR                |
| Selection of exposure (and comparison) group.<br>How was selection bias minimised? | +              | ++           | +                 | +              | +            | NR            | -                | +                 |
| Was the selection of explanatory variables based on a sound theoretical basis?     | NR             | +            | -                 | -              | +            | -             | -                | -                 |
| Was the contamination acceptably low?                                              | ++             | ++           | ++                | ++             | ++           | ++            | ++               | ++                |
| How well were likely confounding factors identified and controlled?                | -              | -            | -                 | -              | +            | -             | -                | -                 |
| Outcome measures and procedures reliable?                                          | -              | NR           | +                 | +              | NR           | NR            | NR               | +                 |
| Were the outcome measurements complete?                                            | ++             | NR           | -                 | NR             | NR           | +             | ++               | ++                |
| Were all the important outcomes assessed?                                          | ++             | +            | ++                | -              | +            | +             | +                | +                 |
| Was there a similar follow-up time in exposure and comparison groups?              | ++             | NR           | +                 | -              | ++           | +             | ++               | ++                |
| Was follow-up time meaningful?                                                     | ++             | ++           | ++                | +              | ++           | ++            | ++               | ++                |
| Was the study sufficiently powered to detect an exposure effect? (if one exists)   | NR             | ++           | NR                | NR             | NR           | NR            | NR               | NR                |
| Were multiple explanatory variables considered in analyses?                        | -              | -            | -                 | -              | +            | -             | -                | -                 |
| Were the analytical methods appropriate?                                           | +              | +            | +                 | +              | +            | +             | -                | +                 |
| Was the precision of association given or calculable?                              | ++             | ++           | +                 | +              | +            | +             | +                | +                 |
| Overall assessment of internal validity                                            | -              | +            | -                 | +              | +            | +             | -                | +                 |
| Overall assessment of external validity                                            | -              | ++           | -                 | -              | -            | +             | -                | -                 |

**Abbreviations:** ++, yes; +, mostly; -, no; NR, not reported; NA, not applicable; ++, all or most of checklist criteria fulfilled; + some of checklist criteria fulfilled; - few or no checklist criteria fulfilled.

**Table S15: Variables adjusted for in multivariable analysis**

|                                | <b>Elliott<br/>et al 1990</b> | <b>Johnson<br/>et al 2011</b> | <b>Moodley<br/>et al 2017</b> | <b>Burton<br/>et al 2018</b> | <b>Heumann<br/>et al 2017</b> |
|--------------------------------|-------------------------------|-------------------------------|-------------------------------|------------------------------|-------------------------------|
| <b>Preterm birth</b>           |                               |                               |                               |                              |                               |
| Age                            | X                             | X                             | X                             |                              |                               |
| Marital status                 |                               |                               |                               |                              | X                             |
| Parity                         |                               |                               | X                             |                              |                               |
| History of preterm birth       |                               | X                             |                               | X                            |                               |
| Pregnancy factors              | X                             | X                             |                               | X                            |                               |
| Socio-economic status          |                               |                               | X                             |                              |                               |
| HIV, CT, TV                    |                               |                               | X                             |                              |                               |
| Number of antenatal visits     |                               |                               |                               | X                            |                               |
| Method of gestation assessment |                               |                               |                               | X                            |                               |
| Smoking                        |                               |                               |                               | X                            | X                             |
| <b>Low birth weight</b>        |                               |                               |                               |                              |                               |
| Age                            | X                             | X                             | X                             |                              |                               |
| Marital status                 |                               |                               |                               |                              | X                             |
| Parity                         |                               |                               | X                             |                              |                               |
| History of preterm birth       |                               | X                             |                               |                              |                               |
| Pregnancy factors              | X                             | X                             |                               |                              |                               |
| Socio-economic status          |                               |                               | X                             |                              |                               |
| HIV, CT, TV                    |                               |                               | X                             |                              |                               |
| Number of antenatal visits     |                               |                               |                               |                              |                               |
| Method of gestation assessment |                               |                               |                               |                              |                               |
| Smoking                        |                               |                               |                               |                              | X                             |

**Abbreviations:** CT, *Chlamydia trachomatis*; HIV, human immunodeficiency virus; TV, *Trichomonas vaginalis*.

Table S16: Summary estimates from fixed effects analysis

| Adverse outcome                      | Study design            | Number of studies | Summary estimate OR (95% CI) | I <sup>2</sup> (%) |
|--------------------------------------|-------------------------|-------------------|------------------------------|--------------------|
| <b>Unadjusted estimates</b>          |                         |                   |                              |                    |
| <i>Preterm birth</i>                 |                         |                   |                              |                    |
|                                      | Case control studies    | 6                 | 1.55 (1.28-1.88)             | 0.0                |
|                                      | Cross-sectional studies | 3                 | 1.48 (1.25-1.76)             | 88.4               |
|                                      | Cohort studies          | 9                 | 1.20 (0.91-1.57)             | 60.1               |
|                                      | All studies             | 18                | 1.45 (1.29-1.63)             | 61.1               |
| <i>Spontaneous abortion</i>          |                         |                   |                              |                    |
|                                      | Case control studies    | 1                 | 2.10 (0.60-7.10)             | NA                 |
|                                      | Cross-sectional studies | 1                 | 0.86 (0.56-1.33)             | NA                 |
|                                      | Cohort studies          | 1                 | 52.82 (1.93-1444.39)         | NA                 |
|                                      | All studies             | 3                 | 1.01 (0.67-1.52)             | 72.8               |
| <i>Premature rupture of membrane</i> |                         |                   |                              |                    |
|                                      | Case control studies    | 4                 | 1.11 (0.92-1.35)             | 43.9               |
|                                      | Cross-sectional studies | 4                 | 1.67 (1.34-2.08)             | 0.0                |
|                                      | Cohort studies          | 1                 | 38.64 (1.45-127.34)          | NA                 |
|                                      | All studies             | 9                 | 1.33 (1.15-1.54)             | 59.2               |
| <i>Perinatal mortality</i>           |                         |                   |                              |                    |
|                                      | Case control studies    | 2                 | 1.94 (0.68-5.55)             | 0.0                |
|                                      | Cross-sectional studies | 1                 | 2.55 (1.47-4.42)             | NA                 |
|                                      | Cohort studies          | 6                 | 1.67 (1.12-2.48)             | 57.9               |
|                                      | All studies             | 9                 | 1.93 (1.42-2.62)             | 40.3               |
| <i>Low birth weight</i>              |                         |                   |                              |                    |
|                                      | Case control studies    | 3                 | 1.75 (1.37-2.24)             | 53.3               |
|                                      | Cross-sectional studies | 1                 | 1.20 (0.30-4.30)             | NA                 |
|                                      | Cohort studies          | 4                 | 1.24 (0.99-1.55)             | 82.5               |
|                                      | All studies             | 8                 | 1.45 (1.23-1.70)             | 72.7               |
| <i>Ophthalmia neonatorum</i>         |                         |                   |                              |                    |
|                                      | Case control studies    | 1                 | 0.58 (0.07-4.83)             | NA                 |
|                                      | Cross-sectional studies | 3                 | 9.27 (2.81-30.54)            | 65.9               |
|                                      | Cohort studies          | 2                 | 2.67 (1.60-4.44)             | 0.0                |
|                                      | All studies             | 6                 | 2.98 (1.89-4.72)             | 58.0               |
| <b>Adjusted estimates</b>            |                         |                   |                              |                    |
| <i>Preterm birth</i>                 |                         |                   |                              |                    |
|                                      | Case control studies    | 4                 | 1.31 (1.04,1.64)             | 72.3               |
|                                      | Cohort studies          | 1                 | 1.70 (0.81-3.56)             | NA                 |
|                                      | All studies             | 5                 | 1.34 (1.08-1.67)             | 64.5               |
| <i>Low birth weight</i>              |                         |                   |                              |                    |
|                                      | Case control studies    | 3                 | 1.44 (1.10-1.90)             | 63.7               |
|                                      | Cohort studies          | 1                 | 0.90 (0.23-3.54)             | NA                 |
|                                      | All studies             | 4                 | 1.42 (1.08-1.86)             | 49.5               |

Abbreviations: CI, confidence interval; NA, not applicable
